# Supplementary material for: Alteration in the level of NR2F2-AS1/ miR-320b / BMI1 differentially converges with the progression of gastric adenocarcinoma toward metastasis
Source: Research Square preprint supplement (doi:10.21203/rs.3.rs-2681039/v1), 2023-03-17
Supplement: Supplementary file 1 [file 373bc06d040f032fd9c8fec6.docx]

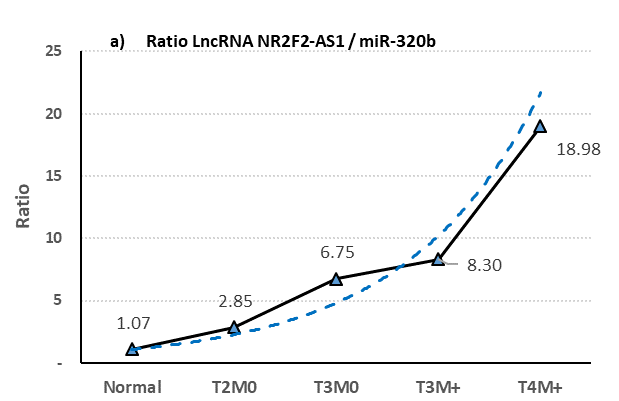

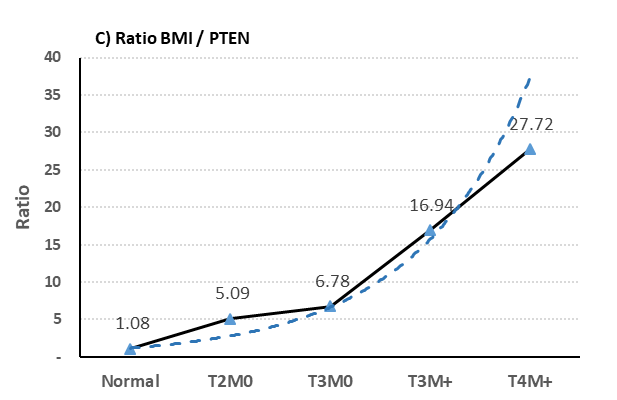

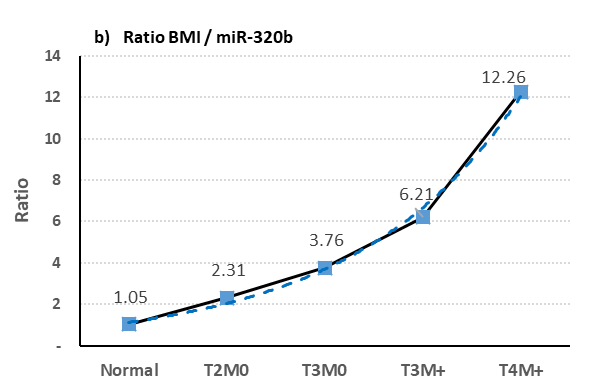


**Fig.S1**: The ratio of lncRNA NR2F2-AS1 expression to miR-320b **(a)**, BMI1 to miR-320b **(b)**, and BMI1 to PTEN **(c).**

**Table-S1**: Demographic characteristic of individuals

| **Variable** | **Participants** |
| --- | --- |
| **n=40** |
| **Mean Age (±SD) (Min-Max)** | 59.1 (± 12.51) (33 - 86) |
| No. of Age < 60 | 20 (50 %) |
| Mean Age< 60 (±SD) (Min-Max) | 49.4 (± 7.71) (33 - 59) |
| No. of Age ≥ 60 | 20 (50 %) |
| Mean Age≥ 60 (±SD) (Min-Max) | 68.9 (± 7.86) (61 - 86) |
| **Gender** |  |
| Female | 11 (27.5 %) |
| Male | 29 (72.5 %) |
| **Metastasis status** |  |
| No metastasis | 23 (57.5 %) |
| Metastasis | 17 (42.5 %) |
| **Grouping in the base of Stage** |  |
| Lower Stages (<T3a & M0) | 14 (35.0 %) |
| No Metastatic Higher Stages (≥T3 & M0) | 9 (22.5 %) |
| Metastatic Higher Stages (≥T3 & M+) | 17 (42.5 %) |
| **Grade** |  |
| G1 (well-differentiated) | 5 (12.5 %) |
| G2 (moderate differentiated) | 11 (27.5 %) |
| G3 (poorly differentiated) | 17 (42.5 %) |
| G4 (non-differentiated) | 7 (17.5 %) |
| **Tumor Size** |  |
| ≤ 5 cm | 15 (37.5 %) |
| > 5 cm | 25 (62.5 %) |
| **Alive after Sampling so far** |  |
| Still alive | 13 (32.5 %) |
| Death | 27 (67.5%) |

**Table-S2**: Real-time PCR primers..

| **Genes** | **Primer** | **Sequence (5**'**→3**') | **Tm (0C)** |
| --- | --- | --- | --- |
| **NR2F2-AS1** | F- | TCAGCCGGAAAACTACAAGCTC | 62 |
| R- | TCTTCGTGTAGCTGTTCCACC | 61 |
| **BMI1** | F- | GGTACTTCATTGATGCCACAACC | 63 |
| R- | CTGGTCTTGTGAACTTGGACATC | 63 |
| **PTEN** | F- | TGAGTTCCCTCAGCCGTTACCT | 64 |
| R- | GAGGTTTCCTCTGGTCCTGGTA | 64 |
| **miR-320b** | F- | GCTGGGTTGAGAGGG | 60 |
| R- | CGCTTCACGAATTTGCGTGT | 61 |
| **U6** | F- | AAG GAT GAC ACG CAA A | 61 |
| R- | CGCTTCACGAATTTGCGTGT | 61 |
| **GAPDH** | F- | GTCTCCTCTGACTTCAACAGCG | 62 |
| R- | ACCACCCTGTTGCTGTAGCCAA | 62 |

**Table-S3:** Correlation analysis between studied genes

| **Spearman Correlation between.....** | **r-value** | **95% confidence interval** | **p-value** |
| --- | --- | --- | --- |
| **BMI & LncRNA NR2F2-AS1** | **0.7615** | **0.6468 to 0.8425** | **<0.0001** |
| **BMI & miR-320b** | **-0.6893** | **-0.7919 to -0.5488** | **<0.0001** |
| **PTEN & LncRNA NR2F2-AS1** | **-0.5435** | **-0.6818 to -0.3676** | **<0.0001** |
| **PTEN & miR-320b** | **0.4792** | **0.2900 to 0.6323** | **<0.0001** |
| **BMI & PTEN** | **-0.4569** | **-0.6149 to -0.2637** | **<0.0001** |
| **LncRNA NR2F2-AS1 & miR-320b** | **-0.7524** | **-0.8362 to -0.6343** | **<0.0001** |

**Table-S4:** Correlation analysis between studied genes and tumor size

| **Spearman Correlation between.....** | **r-value** | **95% confidence interval** | **p-value** |
| --- | --- | --- | --- |
| **Tumor Size & BMI** | **0.2013** | **-0.1176 to 0.4825** | **0.2130** |
| **Tumor Size & PTEN** | **-0.2037** | **-0.4845 to 0.1151** | **0.2074** |
| **Tumor Size & LncRNA NR2F2-AS1** | **0.3152** | **0.004085 to 0.5707** | **0.0476** |
| **Tumor Size & miR-320b** | **-0.2283** | **-0.5039 to 0.08961** | **0.1566** |


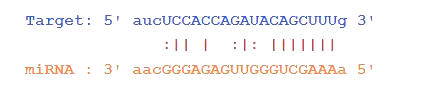

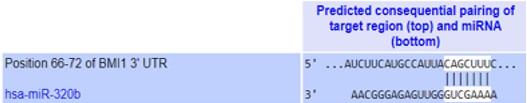

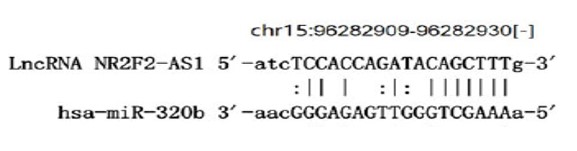


**a)**

**b)**

**c)**

**Fig.S2**: The prediction interaction of BMI1 gene and miR-320b in the base of **(a)** miRDB and **(b)** StarBase tools analysis. **(c)** The prediction of interaction of lncRNA NR2F2-AS1 and miR-320b in a base of analysis by Diana Tools (The links mentioned in the method).


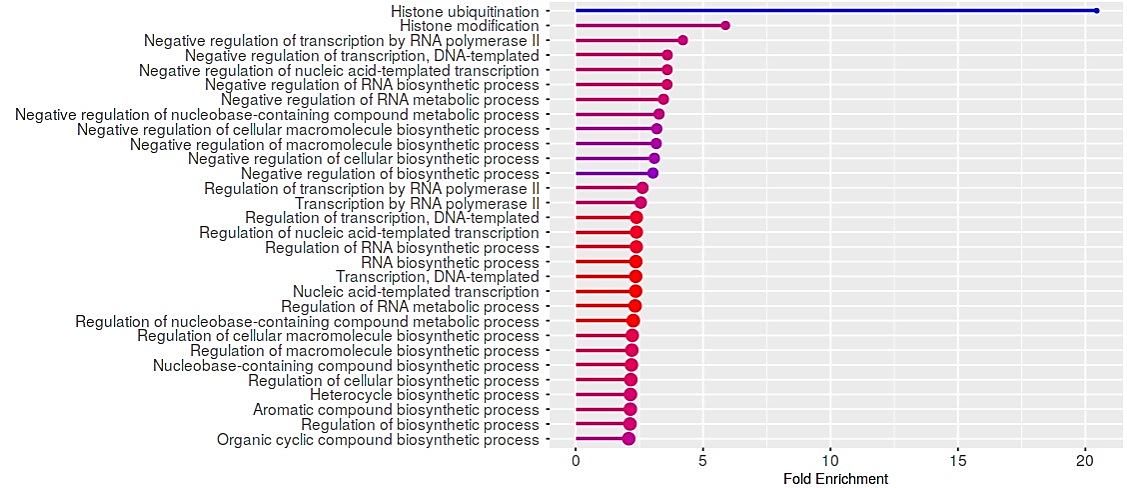

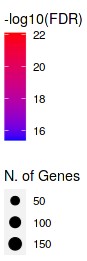


**A) Biological Functions**


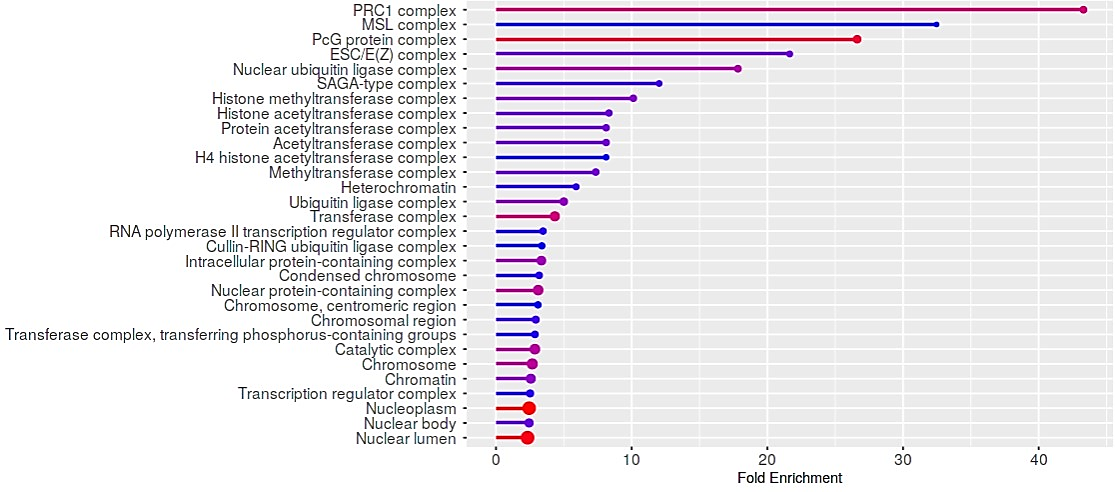

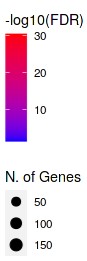


**B) Cellular Components**


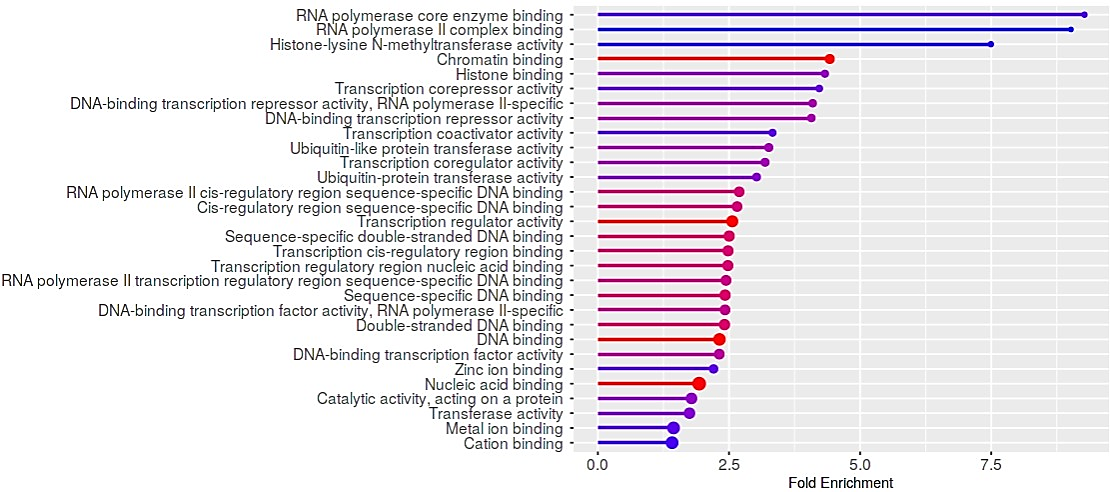

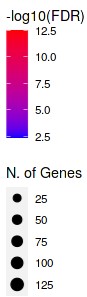


**C) Molecular Functions**

**D) KEGG pathways**


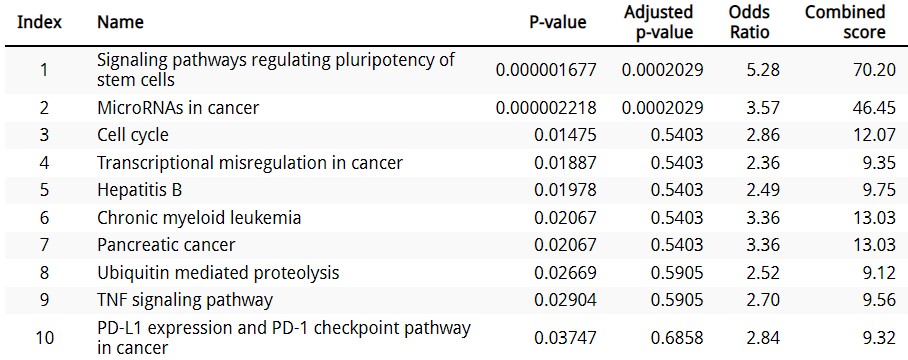


**Fig.S3**: GO enrichment assessment. Significantly enriched GO annotation of biological functions **(A)**, Cellular components **(B)**, and Molecular functions **(C)**. Top 10 KEGG pathways enrichment analysis **(D).**
